# Supplementary material for: Peripheral blood RNA gene expression in children with pneumococcal meningitis: a prospective case–control study
Source: PubMed Central journal article supplement (PMC5862186; doi:10.1136/bmjpo-2017-000092), 2017-08-31
Supplement: bmjpo-2017-000092supp001.pdf [file bmjpo-2017-000092supp001.pdf]

**Table S2: Primer sequences and the UPL probe number for each RT qPCR assay**

| Gene Symbol | Gene                                                                                   | Forward Primer (5'-3')                      | Reverse Primer (5'-3')     | UPL Probe | Accession Number                                                                |
|-------------|----------------------------------------------------------------------------------------|---------------------------------------------|----------------------------|-----------|---------------------------------------------------------------------------------|
| ACSL1       | Acyl-CoA synthetase long-chain family member 1                                         | ccactgtgtgacgttcct                          | gcactctgtctgtccgtatcc      | 26        | NM_001995                                                                       |
| ANXA3       | Annexin A3                                                                             | ttgtaaggaatatcaagcagcat                     | gccagagagatcaccttca        | 17        | NM_005139                                                                       |
| C4A         | Complement component 4A (Rodgers blood group)                                          | ggaccctgaagacgaaattg                        | gaagccctcgttcacctg         | 75        | NM_007293, NM_001252204                                                         |
| C3AR1       | complement component 3a receptor 1                                                     | aagaaagcaaggcagtcatt                        | cgtgtgagctcctcactgaa       | 16        | NM_004054                                                                       |
| ILR2A       | ILR2A interleukin 1 receptor, type II                                                  | tacgcaccacagtcaaggaa                        | aagaaggccagtgaagtgg        | 2         | NM_004633, NM_173343                                                            |
| MAPK14      | MAPK 14 mitogen-activated protein kinase 14                                            | MAPK 14 mitogen-activated protein kinase 14 | ccatgagatgggtcaccag        | 65        | NM_139012, NM_139014, NM_001315, NM_139013                                      |
| MMP9        | matrix metalloproteinase 9 (gelatinase B, 92kDa gelatinase, 92kDa type IV collagenase) | gaaccaatctcaccgacagg                        | gaaccaatctcaccgacagg       | 6         | NM_004994                                                                       |
| CD177       | CD177 molecule                                                                         | gcctctcctgatctcctaca                        | caaggatcctgggtctgc         | 79        | NM_020406                                                                       |
| CD55        | CD55 molecule, decay accelerating factor for complement (Cromer blood group)           | aataatgatgaaggagatggagtg                    | tggtaggaccttgaagtta        | 77        | NM_000574                                                                       |
| CEACAM1     | Carcinoembryonic antigen-related cell adhesion molecule 1 (biliary glycoprotein)       | taggcctaagaggcttctcc                        | tgagggaaagtatgcacagtccgtgc | 80        | NM_001712, NM_001184816, NM_001184813, NM_001184815, NM_001205344, NM_001024912 |
| GYG1        | Glycogenin 1                                                                           | ctgaaacagcacaggaccac                        | atgccactgtccaagacat        | 75        | NM_004130                                                                       |
| FOLR3       | Folate receptor 3 (gamma)                                                              | cacaaaggctggaattggac                        | cttgaaggagtggctccaga       | 19        | NM_000804                                                                       |
| ITGAM       | Integrin, alpha M (complement component 3 receptor 3 subunit)                          | tctgaagaccattcagaaccag                      | ggagctgtacttctgtctg        | 7         | NM_000632                                                                       |
| LTF         | Lactotransferrin                                                                       | ctaactgaaaaagtgtcaacctc                     | gccatcttctcggttttacttc     | 79        | NM_002343, NM_001199149                                                         |
| OLAH        | Oleoyl-ACP hydrolase                                                                   | accgagatcgctccactg                          | ggagaatcaagtgagattttaaagga | 19        | NM_018324, NM_001039702                                                         |
| RETN        | Resistin                                                                               | tgcaggatgaaagctctctg                        | catggagcacagggtcttg        | 45        | NM_020415                                                                       |

| Gene Symbol | Gene                                                                                | Forward Primer (5'-3')   | Reverse Primer (5'-3')     | UPL Probe | Accession Number                                    |
|-------------|-------------------------------------------------------------------------------------|--------------------------|----------------------------|-----------|-----------------------------------------------------|
| S100A12     | S100 calcium binding protein A12                                                    | tcatatccctgtagccattg     | acctactctttgtgggtgtgt      | 44        | NM_005621                                           |
| SERPINA1    | Serpin peptidase inhibitor, clade A (alpha-1 antiproteinase, antitrypsin), member 1 | aatggggctgacctctcc       | gtcagcacagccttatgcac       | 82        | NM_001002235, NM_001002236, NM_000295               |
| SAMSN1      | SAM domain, SH3 domain and nuclear localization signals 1                           | tgaaaatctgtctgacatggtaca | tagtgggaatgcgtgttca        | 21        | NM_022136, NM_001256370                             |
| VNN1        | Vanin 1                                                                             | tcctgagggttgctgagtg      | agcgtccgtcagttgacac        | 80        | NM_004666                                           |
| CD59        | CD59 molecule, complement regulatory protein                                        | caaggagggtctgtcctgtt     | agcactgcaggct[a or g]tgacc | 66        | NM_000611, NM_203331, NM_203330, NM_203329          |
| CFLAR       | CASP8 and FADD-like apoptosis regulator                                             | gcaatccaaaagagtctcaagg   | tgagcgccaagctgttcc         | 7         | NM_003879                                           |
| KLRF1       | Killer cell lectin-like receptor subfamily F, member 1                              | tgatctcttgatcctgttgg     | tcttctgtgccattatcacttt     | 47        | NM_016523                                           |
| LCN2        | Homo sapiens lipocalin 2                                                            | tcacctcgtcctgtttagg      | aggtaactcgttaatccagggtaa   | 61        | NM_005564                                           |
| NUMB        | Numb homolog (Drosophila)                                                           | gaggaagactgattccccatt    | gcacaggagctgatgctc         | 16        | NM_001005745, NM_003744, NM_001005744, NM_001005743 |
