# Supplementary material for: Peripheral blood RNA gene expression in children with pneumococcal meningitis: a prospective case–control study
Source: PubMed Central journal article supplement (PMC5862186; doi:10.1136/bmjpo-2017-000092), 2017-08-31
Supplement: bmjpo-2017-000092supp002.pdf [file bmjpo-2017-000092supp002.pdf]

**Table S1: Clinical data on children with pneumococcal meningitis and healthy controls**

| <b>Sample ID</b> | <b>Age (years)</b> | <b>Sex</b> | <b>Case/control</b> | <b>HIV status</b> | <b>Survival status</b> | <b>Previous antibiotics use</b> | <b>Duration of symptoms (days)</b> |
|------------------|--------------------|------------|---------------------|-------------------|------------------------|---------------------------------|------------------------------------|
| <b>94</b>        | 0.4                | F          | Case                | Positive          | Died                   | No                              | 2                                  |
| <b>95</b>        | 1.0                | F          | Case                | Positive          | Died                   | Yes                             | 6                                  |
| <b>97</b>        | 5.7                | F          | Case                | Positive          | Died                   | No                              | 1                                  |
| <b>96</b>        | 1.2                | M          | Case                | Positive          | Alive                  | No                              | 3                                  |
| <b>109</b>       | 1.8                | F          | Case                | Positive          | Alive                  | No                              | 2                                  |
| <b>123</b>       | 12.4               | M          | Case                | Positive          | Alive                  | Yes                             | 3                                  |
| <b>82</b>        | 13.0               | M          | Case                | Negative          | Died                   | No                              | 7                                  |
| <b>115</b>       | 0.3                | M          | Case                | Negative          | Died                   | Yes                             | 3                                  |
| <b>121</b>       | 0.5                | F          | Case                | Negative          | Died                   | No                              | 5                                  |
| <b>104</b>       | 0.8                | M          | Case                | Negative          | Alive                  | No                              | 3                                  |
| <b>105</b>       | 0.7                | M          | Case                | Negative          | Alive                  | No                              | 3                                  |
| <b>127</b>       | 10.6               | F          | Case                | Negative          | Alive                  | Yes                             | 3                                  |
| <b>C08</b>       | 7.0                | M          | Control             | Negative          | Alive                  | N/A                             | N/A                                |
| <b>C09</b>       | 7.0                | M          | Control             | Negative          | Alive                  | N/A                             | N/A                                |
| <b>C13</b>       | 7.0                | F          | Control             | Negative          | Alive                  | N/A                             | N/A                                |
