# Supplementary material for: Peripheral blood RNA gene expression in children with pneumococcal meningitis: a prospective case–control study
Source: PubMed Central journal article supplement (PMC5862186; doi:10.1136/bmjpo-2017-000092), 2017-08-31

# Survivors vs non-survivors

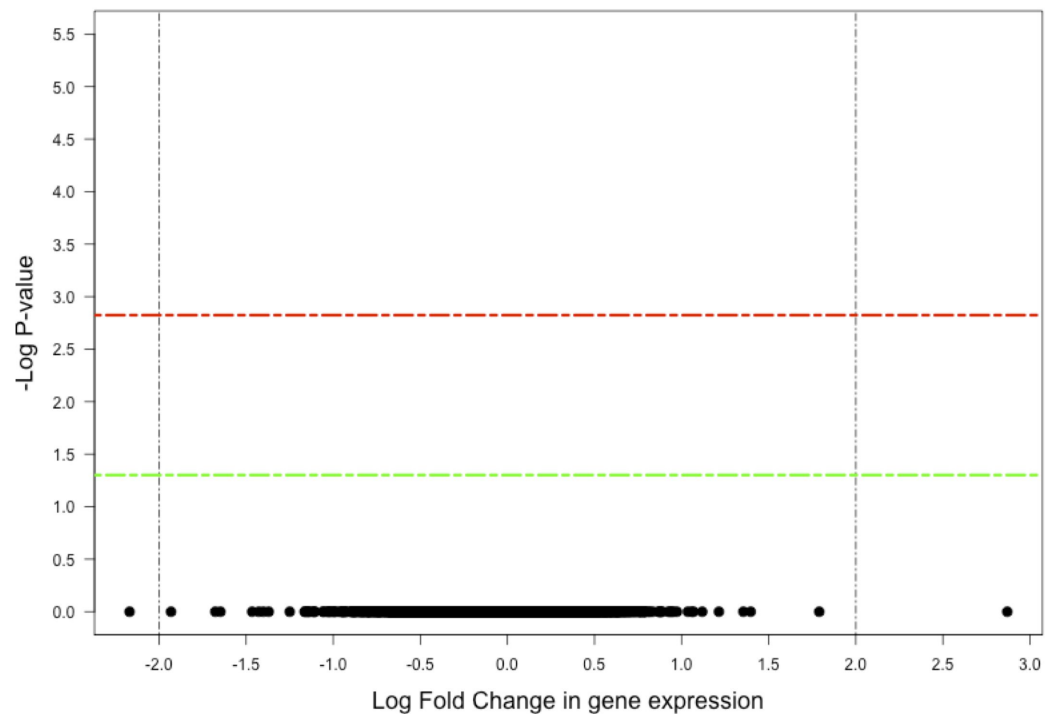

# HIV infected vs HIV un-infected

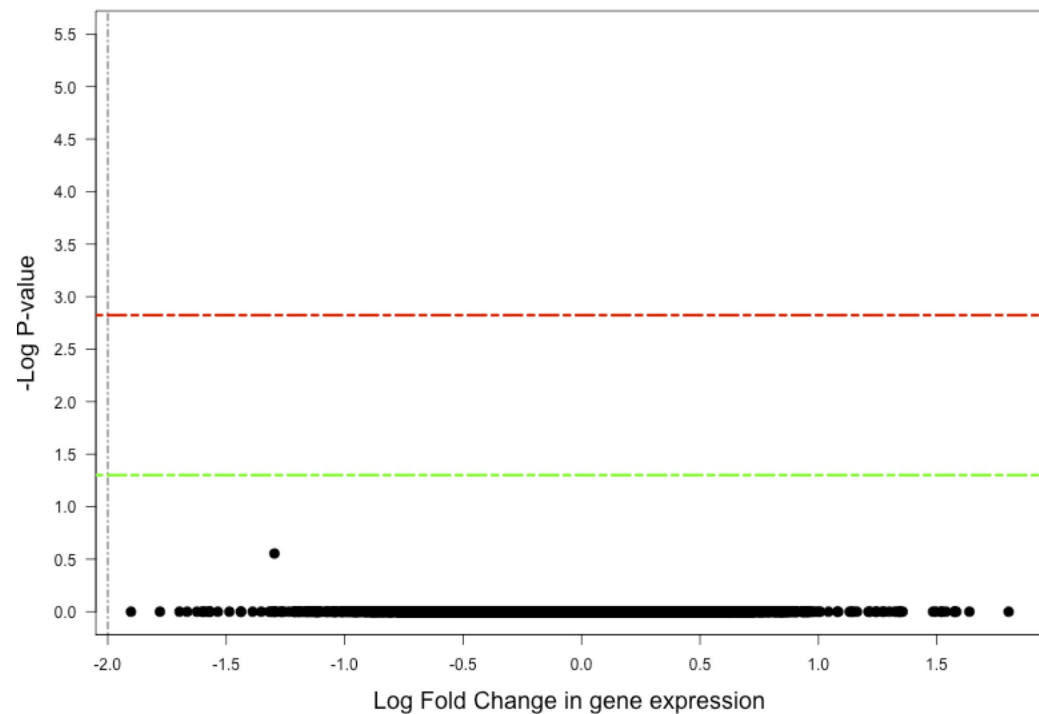

Supplement: bmjpo-2017-000092supp004.pdf [file bmjpo-2017-000092supp004.pdf]
