# Supplementary material for: Peripheral blood RNA gene expression in children with pneumococcal meningitis: a prospective case–control study
Source: PubMed Central journal article supplement (PMC5862186; doi:10.1136/bmjpo-2017-000092), 2017-08-31
Supplement: bmjpo-2017-000092supp007.pdf [file bmjpo-2017-000092supp007.pdf]

**Supplementary Table 3: Canonical pathways of differentially expressed genes between cases and controls in microarray experiment**

| Ingenuity Canonical Pathways                                                   | -log(p-value) | Ratio   | Molecules  |
|--------------------------------------------------------------------------------|---------------|---------|------------|
| LXR/RXR Activation                                                             | 2.77          | 0.0165  | IL1R2,MMP9 |
| Arginine Degradation I (Arginase Pathway)                                      | 2.69          | 0.25    | ARG1       |
| Urea Cycle                                                                     | 2.51          | 0.167   | ARG1       |
| Arginine Degradation VI (Arginase 2 Pathway)                                   | 2.51          | 0.167   | ARG1       |
| Glycogen Biosynthesis II (from UDP-D-Glucose)                                  | 2.51          | 0.167   | GYG1       |
| Granulocyte Adhesion and Diapedesis                                            | 2.51          | 0.0121  | IL1R2,MMP9 |
| Hepatic Fibrosis / Hepatic Stellate Cell Activation                            | 2.43          | 0.011   | IL1R2,MMP9 |
| Airway Pathology in Chronic Obstructive Pulmonary Disease                      | 2.38          | 0.125   | MMP9       |
| Citrulline Biosynthesis                                                        | 2.38          | 0.125   | ARG1       |
| Role of IL-17A in Psoriasis                                                    | 2.17          | 0.0769  | S100A9     |
| Superpathway of Citrulline Metabolism                                          | 2.14          | 0.0714  | ARG1       |
| Inhibition of Angiogenesis by TSP1                                             | 1.79          | 0.0312  | MMP9       |
| Inhibition of Matrix Metalloproteases                                          | 1.71          | 0.0263  | MMP9       |
| Neuroprotective Role of THOP1 in Alzheimer's Disease                           | 1.69          | 0.025   | MMP9       |
| IL-10 Signaling                                                                | 1.46          | 0.0147  | IL1R2      |
| Glioma Invasiveness Signaling                                                  | 1.45          | 0.0143  | MMP9       |
| Bladder Cancer Signaling                                                       | 1.36          | 0.0116  | MMP9       |
| PPAR Signaling                                                                 | 1.34          | 0.0111  | IL1R2      |
| HIF1 $\alpha$ Signaling                                                        | 1.25          | 0.00885 | MMP9       |
| p38 MAPK Signaling                                                             | 1.23          | 0.00855 | IL1R2      |
| Pancreatic Adenocarcinoma Signaling                                            | 1.23          | 0.00847 | MMP9       |
| Atherosclerosis Signaling                                                      | 1.21          | 0.00806 | MMP9       |
| IL-6 Signaling                                                                 | 1.2           | 0.00787 | IL1R2      |
| Ovarian Cancer Signaling                                                       | 1.15          | 0.00699 | MMP9       |
| Relaxin Signaling                                                              | 1.13          | 0.00671 | MMP9       |
| Hepatic Cholestasis                                                            | 1.11          | 0.00637 | IL1R2      |
| PPAR $\alpha$ /RXR $\alpha$ Activation                                         | 1.08          | 0.00602 | IL1R2      |
| Agranulocyte Adhesion and Diapedesis                                           | 1.06          | 0.00571 | MMP9       |
| NF- $\kappa$ B Signaling                                                       | 1.06          | 0.00565 | IL1R2      |
| Regulation of the Epithelial-Mesenchymal Transition Pathway                    | 1.03          | 0.00535 | MMP9       |
| ILK Signaling                                                                  | 1.02          | 0.00521 | MMP9       |
| IL-8 Signaling                                                                 | 1.01          | 0.0051  | MMP9       |
| Leukocyte Extravasation Signaling                                              | 0.996         | 0.00488 | MMP9       |
| LPS/IL-1 Mediated Inhibition of RXR Function                                   | 0.99          | 0.00481 | IL1R2      |
| Role of Osteoblasts, Osteoclasts and Chondrocytes in Rheumatoid Arthritis      | 0.954         | 0.00441 | IL1R2      |
| Colorectal Cancer Metastasis Signaling                                         | 0.928         | 0.00413 | MMP9       |
| Glucocorticoid Receptor Signaling                                              | 0.862         | 0.00352 | IL1R2      |
| Role of Macrophages, Fibroblasts and Endothelial Cells in Rheumatoid Arthritis | 0.84          | 0.00333 | IL1R2      |
| Axonal Guidance Signaling                                                      | 0.686         | 0.00226 | MMP9       |
