# Supplementary material for: Peripheral blood RNA gene expression in children with pneumococcal meningitis: a prospective case–control study
Source: PubMed Central journal article supplement (PMC5862186; doi:10.1136/bmjpo-2017-000092), 2017-08-31
Supplement: bmjpo-2017-000092supp008.pdf [file bmjpo-2017-000092supp008.pdf]

**Supplementary Table 4: Canonical pathways of differentially expressed genes between cases and controls in combined microarray and RT- qPCR experiments**

| Ingenuity Canonical Pathways                                                   | -log(p-value) | Ratio  | Molecules                    |
|--------------------------------------------------------------------------------|---------------|--------|------------------------------|
| Complement System                                                              | 6.35          | 0.111  | CD55,CD59,ITGAM,C3AR1        |
| Granulocyte Adhesion and Diapedesis                                            | 5.02          | 0.0303 | IL1R2,GNAI3,ITGAM,IL1RN,MMP9 |
| LXR/RXR Activation                                                             | 4.24          | 0.0331 | IL1R2,IL1RN,SERPINA1,MMP9    |
| IL-10 Signaling                                                                | 3.64          | 0.0441 | IL1R2,MAPK14,IL1RN           |
| Leukocyte Extravasation Signaling                                              | 3.36          | 0.0195 | GNAI3,MAPK14,ITGAM,MMP9      |
| p38 MAPK Signaling                                                             | 2.95          | 0.0256 | IL1R2,MAPK14,IL1RN           |
| Atherosclerosis Signaling                                                      | 2.88          | 0.0242 | IL1RN,SERPINA1,MMP9          |
| IL-6 Signaling                                                                 | 2.85          | 0.0236 | IL1R2,MAPK14,IL1RN           |
| Inhibition of Angiogenesis by TSP1                                             | 2.84          | 0.0625 | MAPK14,MMP9                  |
| Glucocorticoid Receptor Signaling                                              | 2.83          | 0.0141 | IL1R2,MAPK14,BAG1,IL1RN      |
| IL-17A Signaling in Fibroblasts                                                | 2.77          | 0.0571 | MAPK14,LCN2                  |
| Notch Signaling                                                                | 2.72          | 0.0541 | NUMB,PSEN1                   |
| Acute Phase Response Signaling                                                 | 2.5           | 0.0179 | MAPK14,IL1RN,SERPINA1        |
| Amyloid Processing                                                             | 2.46          | 0.04   | MAPK14,PSEN1                 |
| Agranulocyte Adhesion and Diapedesis                                           | 2.45          | 0.0171 | GNAI3,IL1RN,MMP9             |
| NF- $\kappa$ B Signaling                                                       | 2.44          | 0.0169 | IL1R2,LCK,IL1RN              |
| Molecular Mechanisms of Cancer                                                 | 2.42          | 0.0109 | GNAI3,MAPK14,CFLAR,PSEN1     |
| IL-8 Signaling                                                                 | 2.31          | 0.0153 | GNAI3,ITGAM,MMP9             |
| LPS/IL-1 Mediated Inhibition of RXR Function                                   | 2.24          | 0.0144 | IL1R2,IL1RN,ACSL1            |
| CCR5 Signaling in Macrophages                                                  | 2.21          | 0.0299 | GNAI3,MAPK14                 |
| Chemokine Signaling                                                            | 2.2           | 0.0294 | GNAI3,MAPK14                 |
| Caveolar-mediated Endocytosis Signaling                                        | 2.16          | 0.0282 | CD55,ITGAM                   |
| Arginine Degradation I (Arginase Pathway)                                      | 2.15          | 0.25   | ARG1                         |
| Acetate Conversion to Acetyl-CoA                                               | 2.15          | 0.25   | ACSL1                        |
| Toll-like Receptor Signaling                                                   | 2.14          | 0.0274 | MAPK14,IL1RN                 |
| Role of Osteoblasts, Osteoclasts and Chondrocytes in Rheumatoid Arthritis      | 2.14          | 0.0132 | IL1R2,MAPK14,IL1RN           |
| IL-15 Signaling                                                                | 2.1           | 0.0263 | LCK,MAPK14                   |
| Rapoport-Luebering Glycolytic Shunt                                            | 2.06          | 0.2    | BPGM                         |
| PEDF Signaling                                                                 | 2.02          | 0.0238 | MAPK14,CFLAR                 |
| Urea Cycle                                                                     | 1.98          | 0.167  | ARG1                         |
| Arginine Degradation VI (Arginase 2 Pathway)                                   | 1.98          | 0.167  | ARG1                         |
| Glycogen Biosynthesis II (from UDP-D-Glucose)                                  | 1.98          | 0.167  | GYG1                         |
| PPAR Signaling                                                                 | 1.96          | 0.0222 | IL1R2,IL1RN                  |
| IL-1 Signaling                                                                 | 1.95          | 0.022  | GNAI3,MAPK14                 |
| Cholecystokinin/Gastrin-mediated Signaling                                     | 1.87          | 0.0198 | MAPK14,IL1RN                 |
| Airway Pathology in Chronic Obstructive Pulmonary Disease                      | 1.86          | 0.125  | MMP9                         |
| Citrulline Biosynthesis                                                        | 1.86          | 0.125  | ARG1                         |
| Corticotropin Releasing Hormone Signaling                                      | 1.82          | 0.0187 | GNAI3,MAPK14                 |
| Role of Macrophages, Fibroblasts and Endothelial Cells in Rheumatoid Arthritis | 1.81          | 0.01   | IL1R2,MAPK14,IL1RN           |
| Paxillin Signaling                                                             | 1.8           | 0.0182 | MAPK14,ITGAM                 |
| HIF1 $\alpha$ Signaling                                                        | 1.78          | 0.0177 | MAPK14,MMP9                  |
| Role of Tissue Factor in Cancer                                                | 1.73          | 0.0168 | LCK,MAPK14                   |
| FXR/RXR Activation                                                             | 1.69          | 0.016  | IL1RN,SERPINA1               |
| CCR3 Signaling in Eosinophils                                                  | 1.69          | 0.0159 | GNAI3,MAPK14                 |

|                                                                                        |      |         |                 |
|----------------------------------------------------------------------------------------|------|---------|-----------------|
| GNRH Signaling                                                                         | 1.68 | 0.0157  | GNAI3,MAPK14    |
| Role of IL-17A in Psoriasis                                                            | 1.65 | 0.0769  | S100A9          |
| Fatty Acid Activation                                                                  | 1.65 | 0.0769  | ACSL1           |
| Superpathway of Citrulline Metabolism                                                  | 1.61 | 0.0714  | ARG1            |
| IL-12 Signaling and Production in Macrophages                                          | 1.58 | 0.0139  | MAPK14,SERPINA1 |
| Parkinson's Signaling                                                                  | 1.56 | 0.0625  | MAPK14          |
| Relaxin Signaling                                                                      | 1.55 | 0.0134  | GNAI3,MMP9      |
| $\gamma$ -linolenate Biosynthesis II (Animals)                                         | 1.53 | 0.0588  | ACSL1           |
| Mitochondrial L-carnitine Shuttle Pathway                                              | 1.53 | 0.0588  | ACSL1           |
| Oxidative Ethanol Degradation III                                                      | 1.53 | 0.0588  | ACSL1           |
| Hepatic Cholestasis                                                                    | 1.51 | 0.0127  | IL1R2,IL1RN     |
| PPAR $\alpha$ /RXR $\alpha$ Activation                                                 | 1.47 | 0.012   | IL1R2,MAPK14    |
| Tec Kinase Signaling                                                                   | 1.46 | 0.0119  | GNAI3,LCK       |
| Ethanol Degradation IV                                                                 | 1.44 | 0.0476  | ACSL1           |
| Differential Regulation of Cytokine Production in Intestinal Epithelial Cells by IL-17 | 1.4  | 0.0435  | LCN2            |
| Role of NFAT in Regulation of the Immune Response                                      | 1.4  | 0.0111  | GNAI3,LCK       |
| Hepatic Fibrosis / Hepatic Stellate Cell Activation                                    | 1.4  | 0.011   | IL1R2,MMP9      |
| Dendritic Cell Maturation                                                              | 1.39 | 0.011   | MAPK14,IL1RN    |
| Endothelin-1 Signaling                                                                 | 1.39 | 0.0109  | GNAI3,MAPK14    |
| IL-22 Signaling                                                                        | 1.38 | 0.0417  | MAPK14          |
| Glycolysis I                                                                           | 1.38 | 0.0417  | BPGM            |
| Regulation of the Epithelial-Mesenchymal Transition Pathway                            | 1.37 | 0.0107  | MMP9,PSEN1      |
| IL-17A Signaling in Gastric Cells                                                      | 1.37 | 0.04    | MAPK14          |
| Role of JAK family kinases in IL-6-type Cytokine Signaling                             | 1.37 | 0.04    | MAPK14          |
| Gluconeogenesis I                                                                      | 1.37 | 0.04    | BPGM            |
| Role of NFAT in Cardiac Hypertrophy                                                    | 1.36 | 0.0106  | GNAI3,MAPK14    |
| Production of Nitric Oxide and Reactive Oxygen Species in Macrophages                  | 1.35 | 0.0104  | MAPK14,SERPINA1 |
| Clathrin-mediated Endocytosis Signaling                                                | 1.33 | 0.0102  | NUMB,SERPINA1   |
| Thrombin Signaling                                                                     | 1.32 | 0.01    | GNAI3,MAPK14    |
| Fatty Acid $\beta$ -oxidation I                                                        | 1.29 | 0.0333  | ACSL1           |
| 4-1BB Signaling in T Lymphocytes                                                       | 1.28 | 0.0323  | MAPK14          |
| G Protein Signaling Mediated by Tubby                                                  | 1.28 | 0.0323  | LCK             |
| Ethanol Degradation II                                                                 | 1.26 | 0.0312  | ACSL1           |
| Systemic Lupus Erythematosus Signaling                                                 | 1.26 | 0.00922 | LCK,IL1RN       |
| Coagulation System                                                                     | 1.22 | 0.0286  | SERPINA1        |
| Cardiac Hypertrophy Signaling                                                          | 1.2  | 0.00862 | GNAI3,MAPK14    |
| April Mediated Signaling                                                               | 1.19 | 0.0263  | MAPK14          |
| Inhibition of Matrix Metalloproteases                                                  | 1.19 | 0.0263  | MMP9            |
| Role of PKR in Interferon Induction and Antiviral Response                             | 1.17 | 0.025   | MAPK14          |
| B Cell Activating Factor Signaling                                                     | 1.17 | 0.025   | MAPK14          |
| Neuroprotective Role of THOP1 in Alzheimer's Disease                                   | 1.17 | 0.025   | MMP9            |
| Stearate Biosynthesis I (Animals)                                                      | 1.17 | 0.025   | ACSL1           |
| Role of Hypercytokinemia/hyperchemokine in the Pathogenesis of Influenza               | 1.16 | 0.0244  | IL1RN           |
| UVC-Induced MAPK Signaling                                                             | 1.15 | 0.0238  | MAPK14          |
| iNOS Signaling                                                                         | 1.14 | 0.0233  | MAPK14          |
| Primary Immunodeficiency Signaling                                                     | 1.13 | 0.0227  | LCK             |
| Graft-versus-Host Disease Signaling                                                    | 1.13 | 0.0227  | IL1RN           |

|                                                                                 |       |         |        |
|---------------------------------------------------------------------------------|-------|---------|--------|
| Role of Cytokines in Mediating Communication between Immune Cells               | 1.06  | 0.0192  | IL1RN  |
| Retinoic acid Mediated Apoptosis Signaling                                      | 1.01  | 0.0172  | CFLAR  |
| MSP-RON Signaling Pathway                                                       | 1.01  | 0.0169  | ITGAM  |
| Calcium-induced T Lymphocyte Apoptosis                                          | 0.999 | 0.0167  | LCK    |
| IL-2 Signaling                                                                  | 0.973 | 0.0156  | LCK    |
| UVB-Induced MAPK Signaling                                                      | 0.96  | 0.0152  | MAPK14 |
| Role of IL-17A in Arthritis                                                     | 0.954 | 0.0149  | MAPK14 |
| EGF Signaling                                                                   | 0.948 | 0.0147  | MAPK14 |
| Melatonin Signaling                                                             | 0.942 | 0.0145  | GNAI3  |
| Glioma Invasiveness Signaling                                                   | 0.936 | 0.0143  | MMP9   |
| Role of MAPK Signaling in the Pathogenesis of Influenza                         | 0.936 | 0.0143  | MAPK14 |
| ErbB4 Signaling                                                                 | 0.936 | 0.0143  | PSEN1  |
| GPCR-Mediated Integration of Enteroendocrine Signaling Exemplified by an L Cell | 0.93  | 0.0141  | GNAI3  |
| Role of PI3K/AKT Signaling in the Pathogenesis of Influenza                     | 0.919 | 0.0137  | GNAI3  |
| Ephrin B Signaling                                                              | 0.919 | 0.0137  | GNAI3  |
| STAT3 Pathway                                                                   | 0.919 | 0.0137  | MAPK14 |
| BMP signaling pathway                                                           | 0.913 | 0.0135  | MAPK14 |
| CD40 Signaling                                                                  | 0.897 | 0.013   | MAPK14 |
| IL-17A Signaling in Airway Cells                                                | 0.897 | 0.013   | MAPK14 |
| ATM Signaling                                                                   | 0.887 | 0.0127  | MAPK14 |
| FLT3 Signaling in Hematopoietic Progenitor Cells                                | 0.872 | 0.0122  | MAPK14 |
| Communication between Innate and Adaptive Immune Cells                          | 0.872 | 0.0122  | IL1RN  |
| Altered T Cell and B Cell Signaling in Rheumatoid Arthritis                     | 0.867 | 0.012   | IL1RN  |
| GPCR-Mediated Nutrient Sensing in Enteroendocrine Cells                         | 0.862 | 0.0119  | GNAI3  |
| $\alpha$ -Adrenergic Signaling                                                  | 0.857 | 0.0118  | GNAI3  |
| IL-17 Signaling                                                                 | 0.857 | 0.0118  | MAPK14 |
| Neuregulin Signaling                                                            | 0.852 | 0.0116  | PSEN1  |
| LPS-stimulated MAPK Signaling                                                   | 0.852 | 0.0116  | MAPK14 |
| NF- $\kappa$ B Activation by Viruses                                            | 0.852 | 0.0116  | LCK    |
| Bladder Cancer Signaling                                                        | 0.852 | 0.0116  | MMP9   |
| TGF- $\beta$ Signaling                                                          | 0.848 | 0.0115  | MAPK14 |
| G Beta Gamma Signaling                                                          | 0.843 | 0.0114  | GNAI3  |
| Factors Promoting Cardiogenesis in Vertebrates                                  | 0.838 | 0.0112  | MAPK14 |
| FGF Signaling                                                                   | 0.834 | 0.0111  | MAPK14 |
| Death Receptor Signaling                                                        | 0.83  | 0.011   | CFLAR  |
| Reelin Signaling in Neurons                                                     | 0.825 | 0.0109  | LCK    |
| ErbB Signaling                                                                  | 0.804 | 0.0103  | MAPK14 |
| CTLA4 Signaling in Cytotoxic T Lymphocytes                                      | 0.8   | 0.0102  | LCK    |
| CDK5 Signaling                                                                  | 0.8   | 0.0102  | MAPK14 |
| RANK Signaling in Osteoclasts                                                   | 0.796 | 0.0101  | MAPK14 |
| Antioxidant Action of Vitamin C                                                 | 0.796 | 0.0101  | MAPK14 |
| UVA-Induced MAPK Signaling                                                      | 0.788 | 0.0099  | MAPK14 |
| Virus Entry via Endocytic Pathways                                              | 0.784 | 0.0098  | CD55   |
| SAPK/JNK Signaling                                                              | 0.78  | 0.00971 | LCK    |
| Mouse Embryonic Stem Cell Pluripotency                                          | 0.772 | 0.00952 | MAPK14 |
| Type I Diabetes Mellitus Signaling                                              | 0.769 | 0.00943 | MAPK14 |
| T Cell Receptor Signaling                                                       | 0.761 | 0.00926 | LCK    |

|                                                                              |       |         |            |
|------------------------------------------------------------------------------|-------|---------|------------|
| Androgen Signaling                                                           | 0.754 | 0.00909 | GNAI3      |
| p53 Signaling                                                                | 0.751 | 0.00901 | MAPK14     |
| Axonal Guidance Signaling                                                    | 0.741 | 0.00452 | GNAI3,MMP9 |
| iCOS-iCOSL Signaling in T Helper Cells                                       | 0.73  | 0.00855 | LCK        |
| Pancreatic Adenocarcinoma Signaling                                          | 0.726 | 0.00847 | MMP9       |
| Fc Epsilon RI Signaling                                                      | 0.723 | 0.0084  | MAPK14     |
| Renin-Angiotensin Signaling                                                  | 0.723 | 0.0084  | MAPK14     |
| Natural Killer Cell Signaling                                                | 0.72  | 0.00833 | LCK        |
| fMLP Signaling in Neutrophils                                                | 0.72  | 0.00833 | GNAI3      |
| Gai Signaling                                                                | 0.72  | 0.00833 | GNAI3      |
| Sphingosine-1-phosphate Signaling                                            | 0.713 | 0.0082  | GNAI3      |
| Type II Diabetes Mellitus Signaling                                          | 0.704 | 0.008   | ACSL1      |
| CD28 Signaling in T Helper Cells                                             | 0.701 | 0.00794 | LCK        |
| PKCθ Signaling in T Lymphocytes                                              | 0.698 | 0.00787 | LCK        |
| Cdc42 Signaling                                                              | 0.692 | 0.00775 | MAPK14     |
| p70S6K Signaling                                                             | 0.689 | 0.00769 | GNAI3      |
| Th1 Pathway                                                                  | 0.689 | 0.00769 | PSEN1      |
| Role of Pattern Recognition Receptors in Recognition of Bacteria and Viruses | 0.686 | 0.00763 | C3AR1      |
| HMGB1 Signaling                                                              | 0.686 | 0.00763 | MAPK14     |
| P2Y Purigenic Receptor Signaling Pathway                                     | 0.686 | 0.00763 | GNAI3      |
| Synaptic Long Term Depression                                                | 0.66  | 0.00714 | GNAI3      |
| Ovarian Cancer Signaling                                                     | 0.652 | 0.00699 | MMP9       |
| Th2 Pathway                                                                  | 0.644 | 0.00685 | PSEN1      |
| Regulation of eIF4 and p70S6K Signaling                                      | 0.624 | 0.00649 | MAPK14     |
| Dopamine-DARPP32 Feedback in cAMP Signaling                                  | 0.614 | 0.00633 | GNAI3      |
| CXCR4 Signaling                                                              | 0.6   | 0.0061  | GNAI3      |
| Mitochondrial Dysfunction                                                    | 0.598 | 0.00606 | PSEN1      |
| Gap Junction Signaling                                                       | 0.595 | 0.00602 | GNAI3      |
| Germ Cell-Sertoli Cell Junction Signaling                                    | 0.589 | 0.00592 | MAPK14     |
| RhoGDI Signaling                                                             | 0.582 | 0.00581 | GNAI3      |
| Ephrin Receptor Signaling                                                    | 0.582 | 0.00581 | GNAI3      |
| Sertoli Cell-Sertoli Cell Junction Signaling                                 | 0.58  | 0.00578 | MAPK14     |
| Th1 and Th2 Activation Pathway                                               | 0.565 | 0.00556 | PSEN1      |
| CREB Signaling in Neurons                                                    | 0.561 | 0.00549 | GNAI3      |
| B Cell Receptor Signaling                                                    | 0.561 | 0.00549 | MAPK14     |
| RAR Activation                                                               | 0.551 | 0.00535 | MAPK14     |
| AMPK Signaling                                                               | 0.549 | 0.00532 | MAPK14     |
| NRF2-mediated Oxidative Stress Response                                      | 0.545 | 0.00526 | MAPK14     |
| ILK Signaling                                                                | 0.541 | 0.00521 | MMP9       |
| 3-phosphoinositide Biosynthesis                                              | 0.539 | 0.00518 | LCK        |
| Breast Cancer Regulation by Stathmin1                                        | 0.523 | 0.00495 | GNAI3      |
| Integrin Signaling                                                           | 0.505 | 0.00472 | ITGAM      |
| cAMP-mediated signaling                                                      | 0.492 | 0.00455 | GNAI3      |
| Superpathway of Inositol Phosphate Compounds                                 | 0.481 | 0.00441 | LCK        |
| Phospholipase C Signaling                                                    | 0.47  | 0.00427 | LCK        |
| Colorectal Cancer Metastasis Signaling                                       | 0.458 | 0.00413 | MMP9       |
| Signaling by Rho Family GTPases                                              | 0.453 | 0.00407 | GNAI3      |

|                                      |       |         |        |
|--------------------------------------|-------|---------|--------|
| Protein Ubiquitination Pathway       | 0.441 | 0.00394 | BAG1   |
| Xenobiotic Metabolism Signaling      | 0.422 | 0.00372 | MAPK14 |
| G-Protein Coupled Receptor Signaling | 0.42  | 0.0037  | GNAI3  |
| Protein Kinase A Signaling           | 0.313 | 0.00266 | GNAI3  |
